# Supplementary material
Source: PubMed Central journal article supplement (PMC1630419)

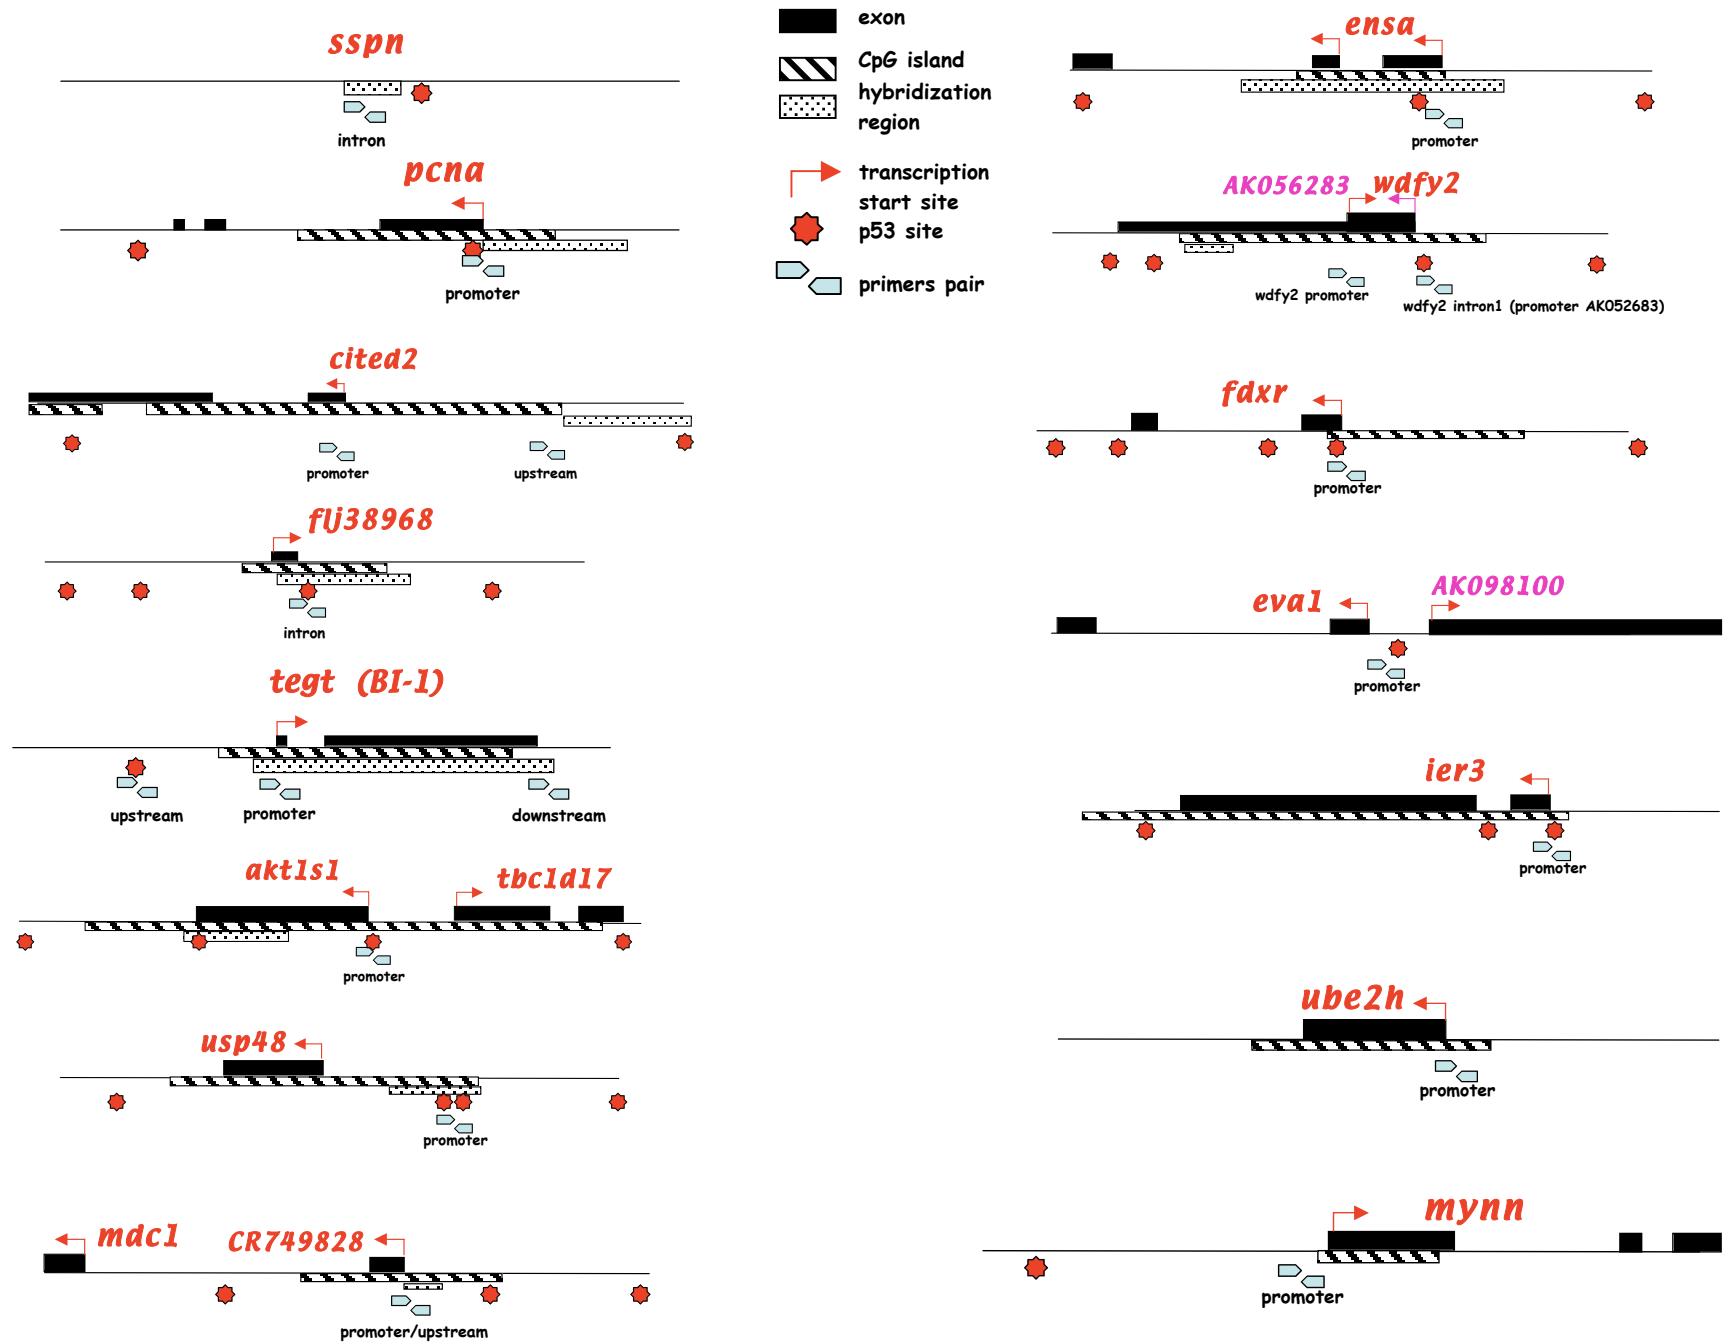

Vigano et al. Suppl\_Fig1

Supplement: 7601375s1.pdf [file 7601375s1.pdf]

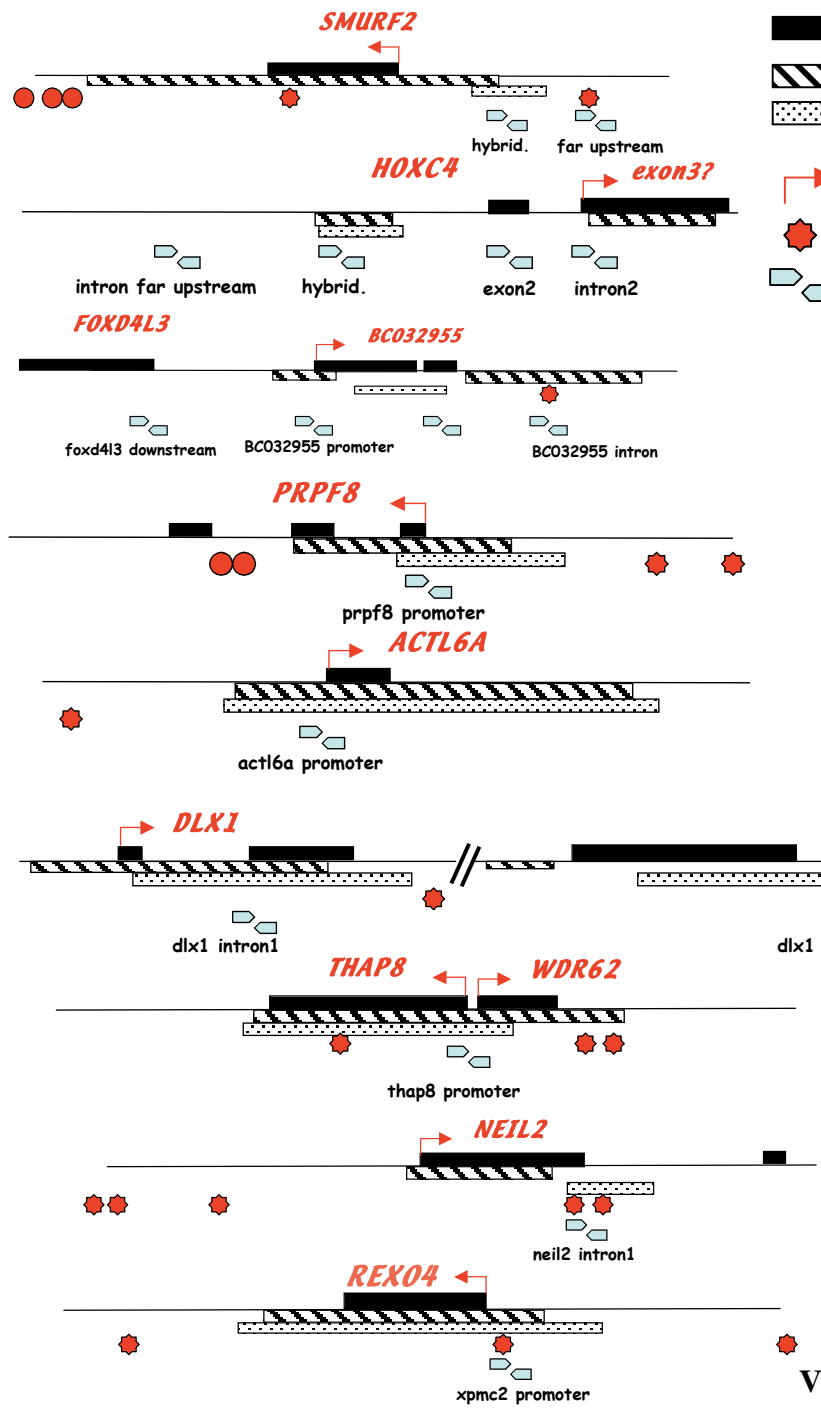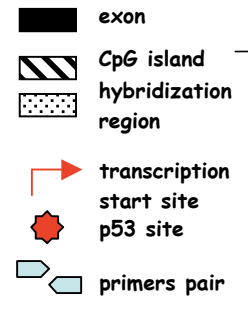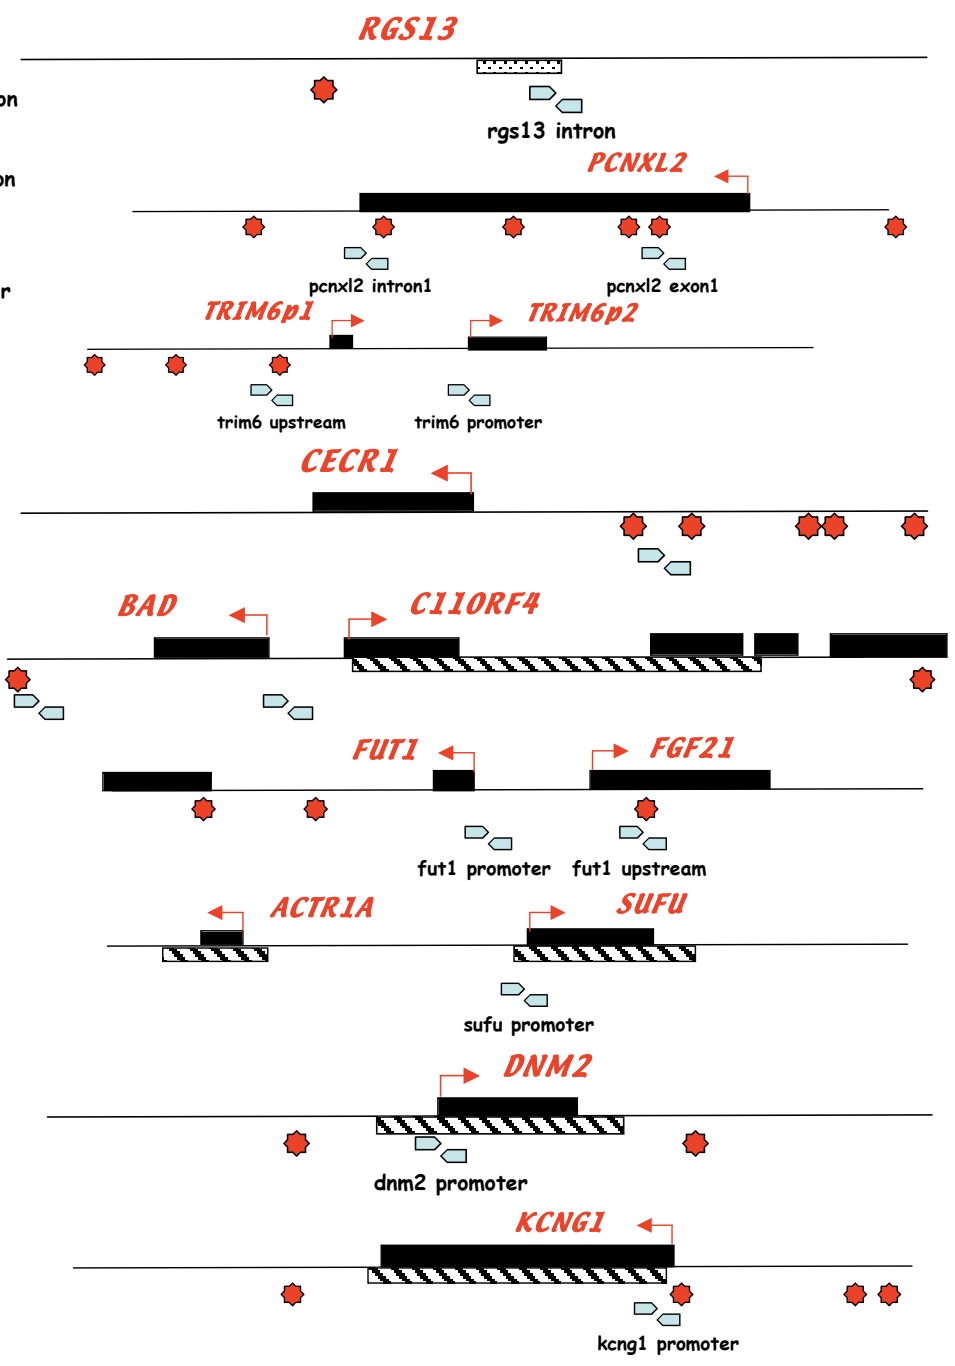

Vigano et al. Suppl\_Fig2

Supplement: 7601375s2.pdf [file 7601375s2.pdf]

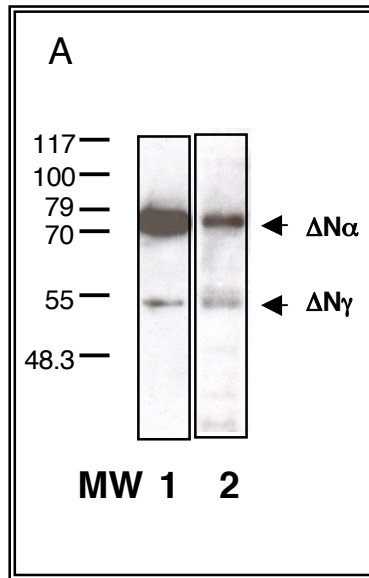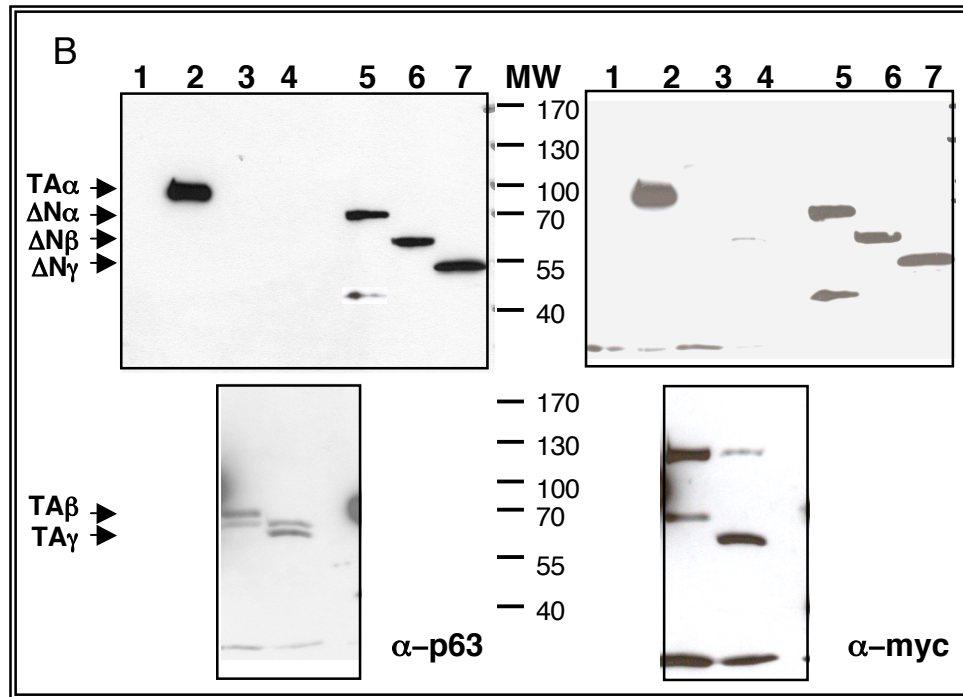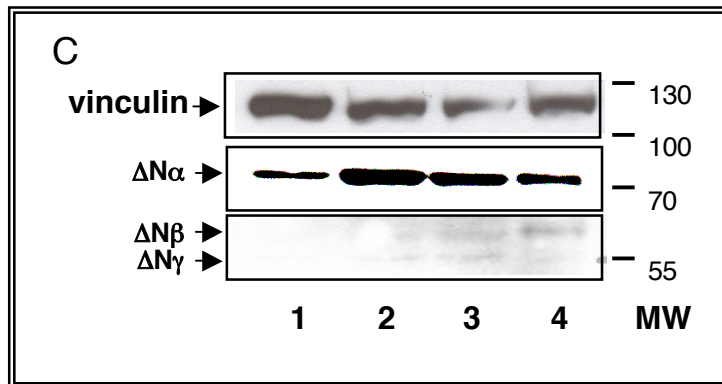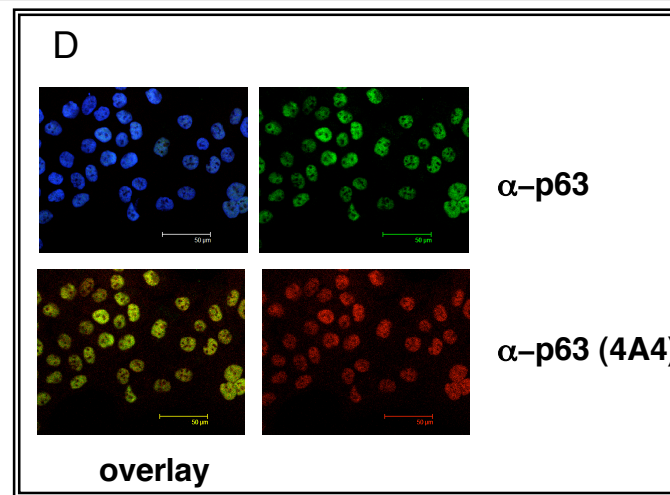

Vigano et al. Suppl\_Fig.3

Supplement: 7601375s3.pdf [file 7601375s3.pdf]
